# Supplementary material
Source: PubMed Central journal article supplement (PMC3326111)
Supplement: 11606_2011_1926_MOESM1_ESM.pdf [file 11606_2011_1926_MOESM1_ESM.pdf]

## Appendices

### Appendix A. Illness perception items and factor loadings

| Questionnaire item                                                                | Median<br>(range) | Factor Loadings |       |       |       |       |       |
|-----------------------------------------------------------------------------------|-------------------|-----------------|-------|-------|-------|-------|-------|
|                                                                                   |                   | Highest<br>load | 1     | 2     | 3     | 4     | 5     |
| My illness has major consequences on my life <sup>1</sup>                         | 4 (1-5)           | 1               | .827  | .196  | -.068 | -.168 | .171  |
| My illness is a serious condition <sup>1</sup>                                    | 4 (1-5)           | 1               | .672  | .149  | -.144 | -.153 | .264  |
| How much does your pain affect the quality of your life? <sup>2</sup>             | 4 (1-4)           | 1               | .705  | .394  | -.144 | -.066 | -.027 |
| How much has your pain disrupted your life? <sup>2</sup>                          | 4 (1-4)           | 1               | .706  | .391  | -.074 | -.090 | -.029 |
| My illness causes difficulties for those who are close to me <sup>1</sup>         | 4 (1-4)           | 1               | .662  | .208  | -.088 | -.174 | .037  |
| My body reminds me every day that I have pain <sup>1</sup>                        | 5 (1-5)           | 1               | .529  | .190  | -.191 | -.065 | .245  |
| How much does your pain affect you emotionally? <sup>2</sup>                      | 3 (1-4)           | 2               | .500  | .508  | -.059 | -.117 | -.194 |
| How much do your treatments actually help your pain? <sup>2</sup>                 | 3 (1-5)           | 3               | -.028 | -.098 | .828  | .093  | .042  |
| My pain is under control most or all of the time <sup>1</sup>                     | 3 (1-5)           | 3               | -.360 | -.368 | .510  | -.006 | .296  |
| How much do you think any treatment can help your pain? <sup>2</sup>              | 3 (1-4)           | 3               | -.099 | .016  | .458  | .191  | .022  |
| How much control do you feel you have over your pain? <sup>2</sup>                | 3 (1-4)           | 3               | -.256 | -.339 | .387  | -.002 | .236  |
| How worried are you about the effect your pain has on your life now? <sup>2</sup> | 3 (1-4)           | 2               | .437  | .773  | -.070 | -.185 | .139  |

|                                                                                       |         |   |       |       |       |       |      |
|---------------------------------------------------------------------------------------|---------|---|-------|-------|-------|-------|------|
| How worried are you about your pain? <sup>2</sup>                                     | 3 (1-4) | 2 | .344  | .664  | -.069 | -.197 | .011 |
| How worried are you that your pain will disrupt your life in the future? <sup>2</sup> | 4 (1-4) | 2 | .217  | .752  | -.137 | -.160 | .174 |
| How satisfied are you with where your life is heading? <sup>2</sup>                   | 3 (1-4) | 4 | -.261 | -.255 | .156  | .568  | .089 |
| How hopeful are you that you will be able to live a good life? <sup>2</sup>           | 3 (1-4) | 4 | -.198 | -.179 | .194  | .791  | .134 |
| The cause of my pain is pretty clear to me <sup>1</sup>                               | 4 (1-5) | 5 | .091  | -.002 | .054  | .147  | .312 |
| I keep close track of my pain from week to week <sup>1</sup>                          | 4 (1-5) | 5 | .065  | .050  | .050  | -.003 | .406 |

1. 5 point scale ranging from 1= Strongly disagree to 5= Strongly agree
2. 4 point scale ranging from 1= Not at all to 4= A lot.

Appendix B. Treatment characteristics included in the ACA survey

| Characteristic                                           | Estimates                                                                                  |
|----------------------------------------------------------|--------------------------------------------------------------------------------------------|
| Improvement pain                                         | 8 out of 10 people will have less pain                                                     |
|                                                          | 5 out of 10 people will have less pain                                                     |
|                                                          | 3 out of 10 people will have less pain                                                     |
| Improvement in ability to do activities                  | 8 out of 10 people can do activities like shopping or golfing with little or no difficulty |
|                                                          | 5 out of 10 people can do activities like shopping or golfing with little or no difficulty |
|                                                          | 3 out of 10 people can do activities like shopping or golfing with little or no difficulty |
| Risk of nausea, dizziness or trouble thinking clearly    | Does not increase your risk of nausea, dizziness or trouble thinking clearly               |
|                                                          | 1 in 10 people will have nausea, dizziness or trouble thinking clearly                     |
|                                                          | 3 in 10 people will have nausea, dizziness or trouble thinking clearly                     |
| Rare risk of potentially life threatening bleeding ulcer | Does not increase your risk of a potentially life threatening bleeding ulcer               |
|                                                          | 1 out of 10 people per year get a potentially life threatening bleeding ulcer              |
|                                                          | 8 out of 10 people per year get a potentially life threatening bleeding ulcer              |
